# Supplementary material for: Regulation of inorganic polyphosphate is required for proper vacuolar proteolysis in fission yeast
Source: PubMed Central journal article supplement (PMC8294586; doi:10.1016/j.jbc.2021.100891), 2021-06-18
Supplement: mmc1.pdf [file mmc1.pdf]

## Supplementary Information

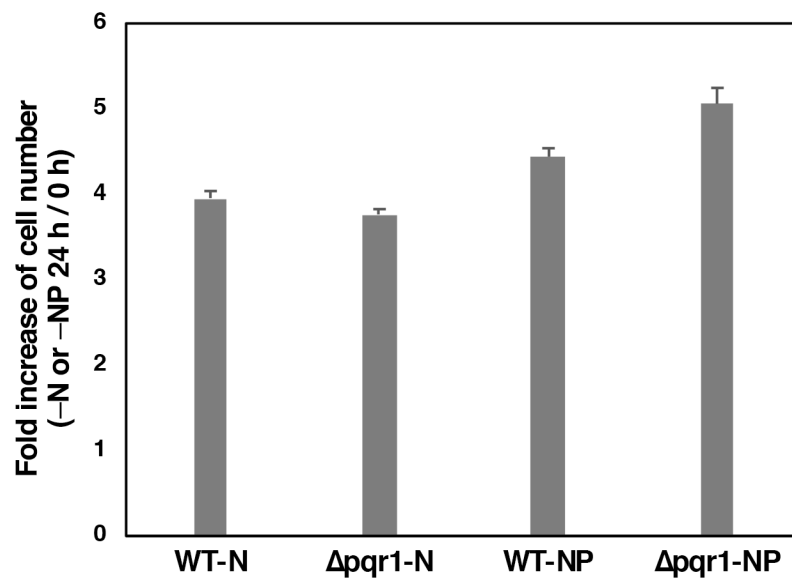

**FIG S1. Cell number increases of WT and  $\Delta pqr1$  after medium shift.** A. Increases of cell concentrations 24 h after the shift to EMM2-N or EMM2-NP. Both WT and  $\Delta pqr1$  divided twice; therefore, cell densities increased approximately 4x. Experiments were repeated 3x, and means and SDs are presented.

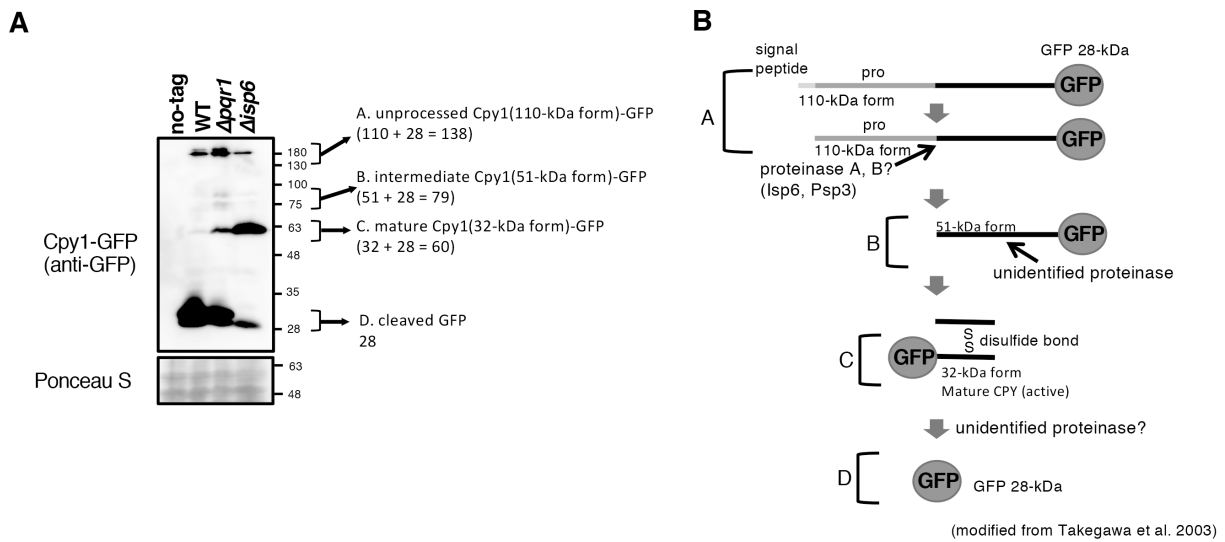

**FIG S2. Maturation of vacuolar protease Cpy1 is abnormal in  $\Delta pqr1$ .** **A.** Cpy1-GFP maturation was examined by anti-GFP immunoblot in indicated strains. In WT, GFP monomer (D) was abundant as active vacuolar proteases may attack the fusion protein. In  $\Delta pqr1$ , Cpy1-GFP fusion proteins before final maturation (A and B) were more abundant than in WT. Band 'B' was broad or could be a doublet. The reason is unclear, but it may be due to glycosylation of Cpy1 (34). In  $\Delta isp6$ , Cpy1-GFP fusion proteins before final maturation (A and B) were comparable to WT, while GFP monomer (D) was less probable due to insufficient protease activity in  $\Delta isp6$ . **B.** A schematic drawing of Cpy1 maturation in *S. pombe*, modified from original article by Takegawa et al (34).

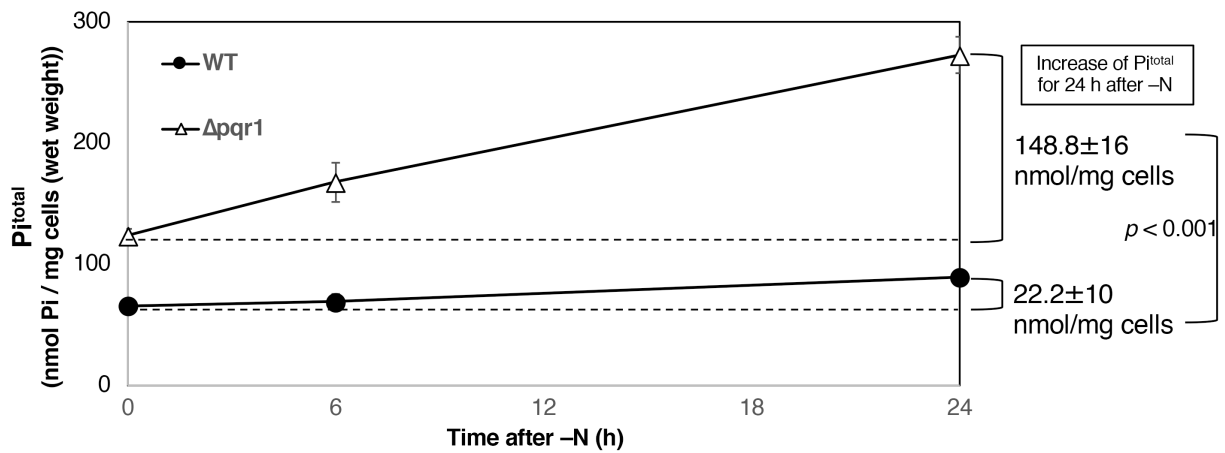

**FIG. S3 Time course analysis of Pi<sup>total</sup> after -N.** To compare phosphate uptake in WT and  $\Delta pqr1$ , Pi<sup>total</sup> of WT and  $\Delta pqr1$  were quantified at the indicated time after -N. Data were normalized with cell masses (mg) because the cell size is reduced in a time-dependent manner after -N. Experiments were repeated 3x, and means and SDs are presented in the graph. Right: the net increases of Pi<sup>total</sup> (0 to 24 h) were calculated. Pi<sup>total</sup> increase in  $\Delta pqr1$  was 144±16 nmol/mg, while 22.2±10 nmol/mg in WT ( $p < 0.001$ ).



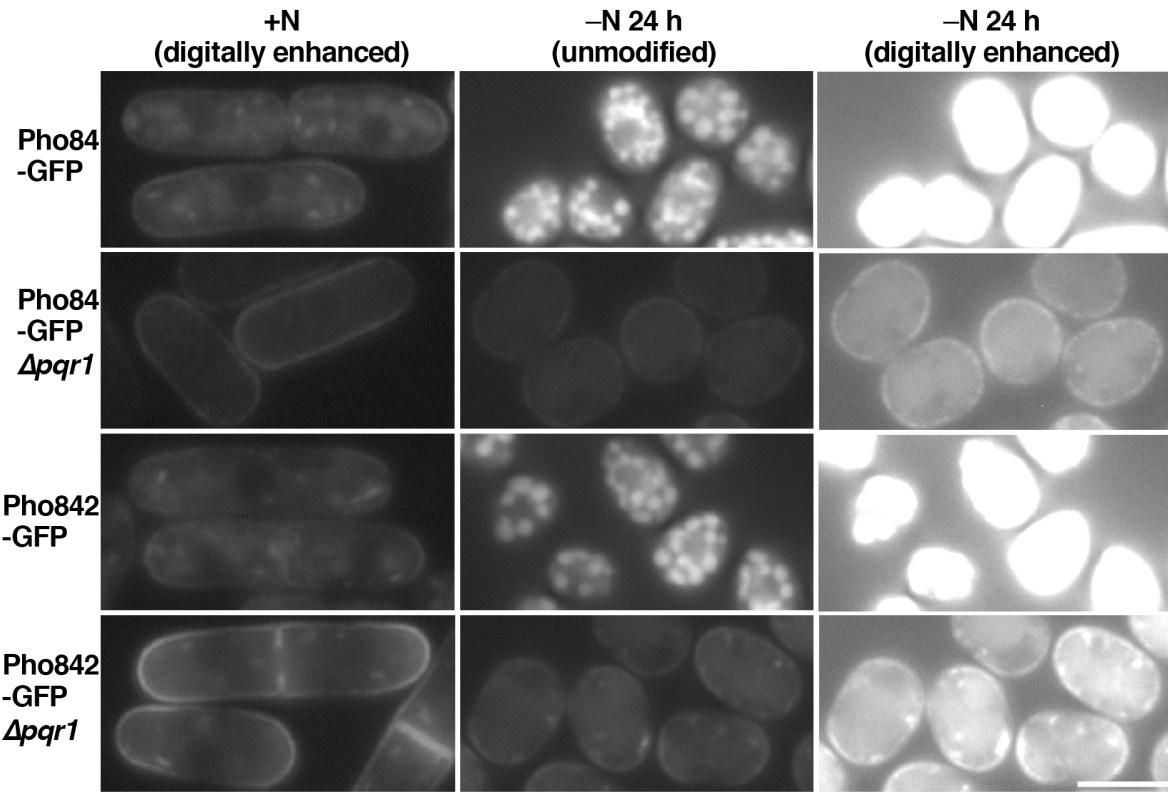

**FIG. S5 Localization of Pho84-GFP and Pho842-GFP.** Signal levels of Pho84-GFP and Pho842-GFP were elevated drastically in WT 24 h after -N and were difficult to compare with signals obtained under other conditions. Therefore, data in Figure 5 were digitally modified using Photoshop level adjustment and presented as described in the text. Here, all images are shown. The left column presents images obtained from cells under +N conditions, and fluorescent signals were digitally enhanced. The central column presents images from cells under -N conditions and no digital modifications were made. The right column presents digitally enhanced versions of the central images. Digital modifications to the left and right columns were the same. Bar, 5  $\mu$ m.

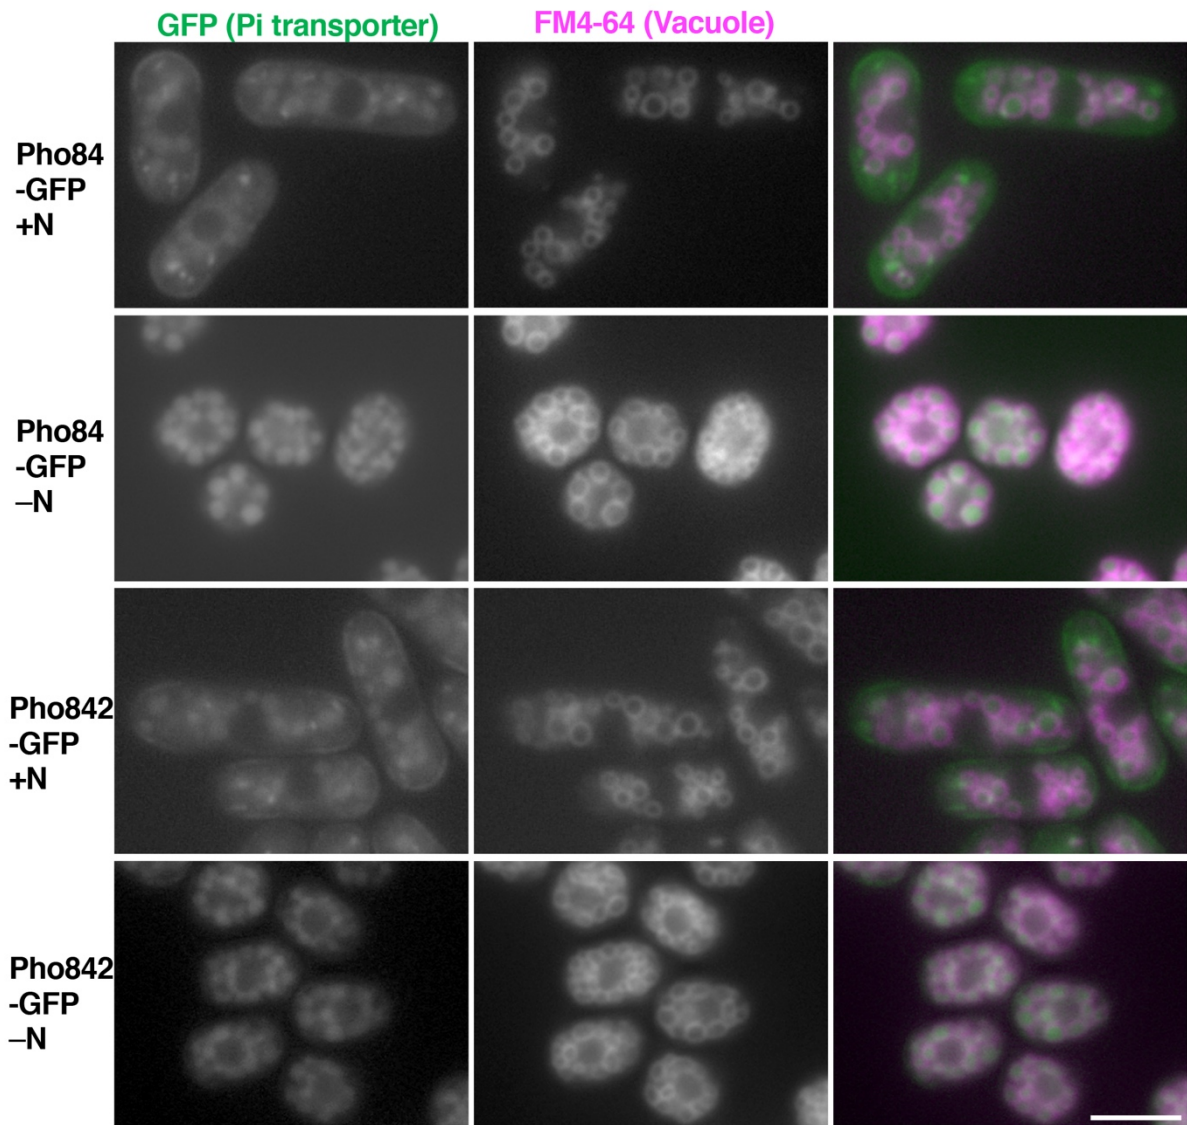

**FIG. S6 Co-localization of phosphate transporters and vacuoles.** Pho84 and Pho842 were visualized with GFP (green) and vacuolar membranes were stained with FM4-64 (magenta). Typically, in -N, GFP signals were surrounded by FM4-64 signals, suggesting that phosphate transporters were translocated to vacuoles. Bar, 5  $\mu$ m.

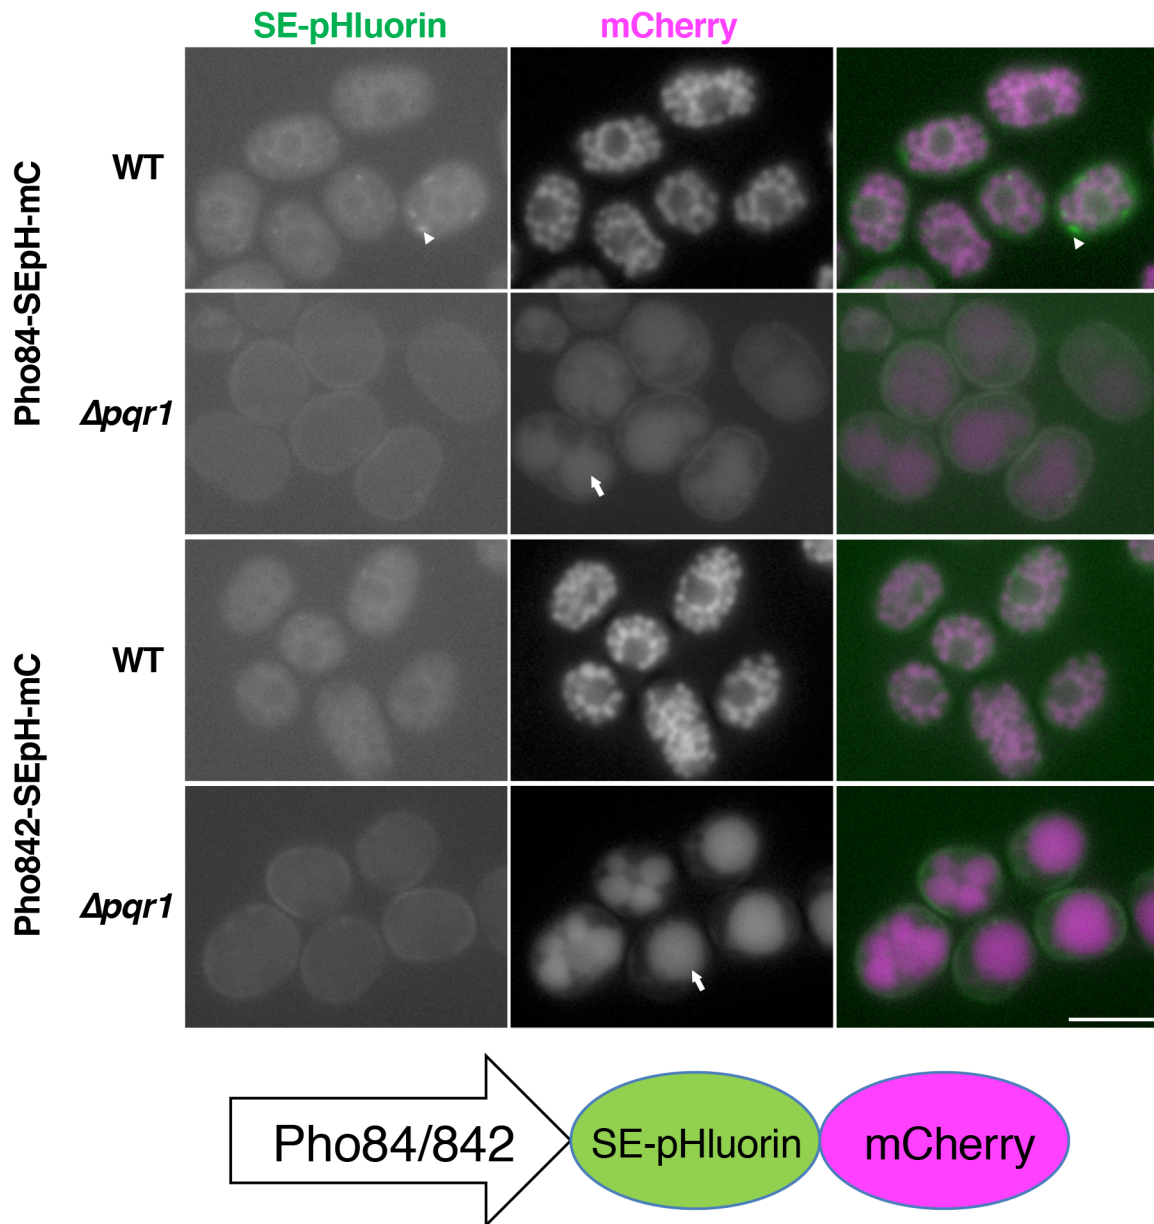

**FIG. S7 Pho84 and Pho842 remained on the plasma membrane in  $\Delta pqr1$  after -N.** To reduce halation from hyper GFP signal in vacuoles, a new tandem tag, Super-Ecliptic-pHluorin (SEpH, green) - mCherry (magenta) was fused chromosomally to Pho84 and Pho842. SEpH is hyper-sensitive to low pH and mCherry is less affected by pH. Clearly, both Pho84-SEpH and Pho842-SEpH were brighter on the plasma membrane in  $\Delta pqr1$  than in WT. Pho84-mCherry and Pho842-mCherry were clearly seen in vacuole like structures in  $\Delta pqr1$  (arrows), but darker than in WT. Bar, 5  $\mu\text{m}$ . Bottom; schematic drawing of fusion proteins.

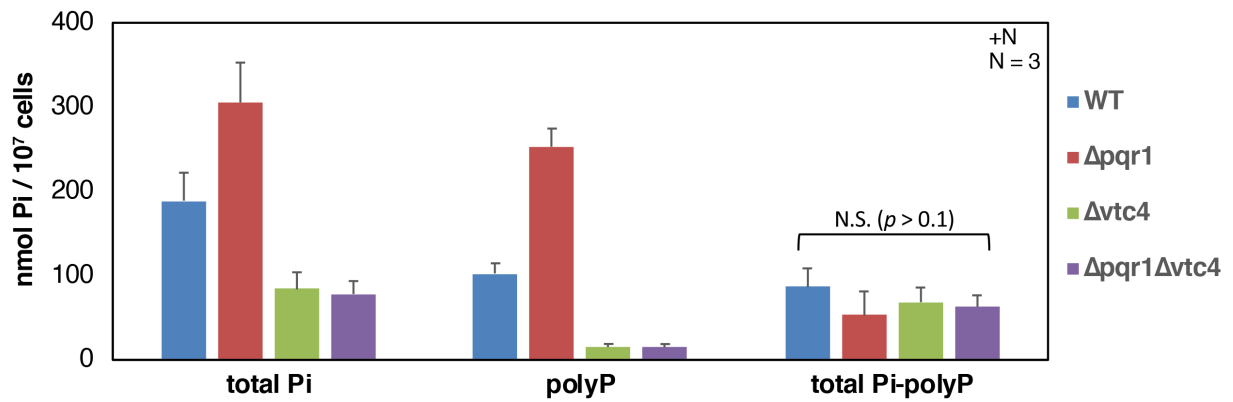

**FIG. S8 Comparison of amounts of  $Pi^{total}$  and polyP.**  $Pi^{total}$  and polyP were quantified in indicated strains under +N conditions. Non-polyP phosphate in the cell was calculated and shown as ' $Pi^{total} - polyP$ ', and was not significantly different among strains ( $p > 0.1$ ). Experiments were repeated 3x, and means and SDs are presented.



**Table S1 The list of *S. pombe* strains used in this study**

| Strain | Genotype                                                                                                                 | Source                  |
|--------|--------------------------------------------------------------------------------------------------------------------------|-------------------------|
| KP162  | h <sup>-</sup> $\Delta$ <i>pqr1</i> ::kanMX                                                                              | BIONEER <sup>#</sup>    |
| KP445  | h <sup>-</sup> $\Delta$ <i>atg3</i> ::kanMX                                                                              | BIONEER <sup>#</sup>    |
| KP446  | h <sup>-</sup> $\Delta$ <i>atg5</i> ::kanMX                                                                              | BIONEER <sup>#</sup>    |
| KP447  | h <sup>-</sup> $\Delta$ <i>atg6</i> ::kanMX                                                                              | BIONEER <sup>#</sup>    |
| KP448  | h <sup>-</sup> $\Delta$ <i>atg7</i> ::kanMX                                                                              | BIONEER <sup>#</sup>    |
| KP449  | h <sup>-</sup> $\Delta$ <i>atg13</i> ::kanMX                                                                             | BIONEER <sup>#</sup>    |
| KP570  | h <sup>+</sup> $\Delta$ <i>pqr1</i> ::natMX $\Delta$ <i>atg8</i> ::kanMX                                                 | This study <sup>S</sup> |
| KP573  | h <sup>-</sup> $\Delta$ <i>pqr1</i> ::hphMX                                                                              | This study              |
| KP576  | h <sup>-</sup> $\Delta$ <i>pqr1</i> ::natMX $\Delta$ <i>atg5</i> ::kanMX                                                 | This study <sup>S</sup> |
| KP580  | h <sup>-</sup> $\Delta$ <i>pqr1</i> ::natMX $\Delta$ <i>atg3</i> ::kanMX                                                 | This study <sup>S</sup> |
| KP582  | h <sup>-</sup> $\Delta$ <i>pqr1</i> ::natMX $\Delta$ <i>atg7</i> ::kanMX                                                 | This study <sup>S</sup> |
| KP584  | h <sup>-</sup> $\Delta$ <i>pqr1</i> ::natMX $\Delta$ <i>atg6</i> ::kanMX                                                 | This study <sup>S</sup> |
| KP586  | h <sup>-</sup> $\Delta$ <i>pqr1</i> ::natMX $\Delta$ <i>atg13</i> ::kanMX                                                | This study <sup>S</sup> |
| KP596  | h <sup>+</sup> $\Delta$ <i>atg3</i> ::kanMX GFP- <i>atg8</i> <sup>+</sup> : <i>leu1</i> <sup>+</sup> <i>leu1</i> -32     | This study <sup>S</sup> |
| KP598  | h <sup>+</sup> $\Delta$ <i>atg5</i> ::kanMX GFP- <i>atg8</i> <sup>+</sup> : <i>leu1</i> <sup>+</sup> <i>leu1</i> -32     | This study <sup>S</sup> |
| KP600  | h <sup>+</sup> $\Delta$ <i>atg13</i> ::kanMX GFP- <i>atg8</i> <sup>+</sup> : <i>leu1</i> <sup>+</sup> <i>leu1</i> -32    | This study <sup>S</sup> |
| KP622  | h <sup>-</sup> mCherry- <i>atg8</i> <sup>+</sup> : <i>leu1</i> <sup>+</sup> <i>leu1</i> -32                              | This study              |
| KP623  | h <sup>-</sup> $\Delta$ <i>pqr1</i> ::hphMX mCherry- <i>atg8</i> <sup>+</sup> : <i>leu1</i> <sup>+</sup> <i>leu1</i> -32 | This study              |
| KP662  | h <sup>-</sup> <i>atg14</i> <sup>+</sup> -GFP::kanMX                                                                     | This study              |
| KP663  | h <sup>-</sup> <i>atg16</i> <sup>+</sup> -GFP::kanMX                                                                     | This study              |
| KP665  | h <sup>+</sup> $\Delta$ <i>pqr1</i> :: hphMX <i>atg14</i> <sup>+</sup> -GFP::kanMX                                       | This study              |
| KP666  | h <sup>+</sup> $\Delta$ <i>pqr1</i> :: hphMX <i>atg16</i> <sup>+</sup> -GFP::kanMX                                       | This study              |
| KP96   | h <sup>-</sup> $\Delta$ <i>atg8</i> ::hphMX                                                                              | This study              |
| SN128  | h <sup>-</sup> <i>pho84</i> <sup>+</sup> -GFP::kanMX                                                                     | This study              |
| SN138  | h <sup>-</sup> <i>pho842</i> <sup>+</sup> -GFP::kanMX                                                                    | This study              |
| SN172  | h <sup>-</sup> $\Delta$ <i>vtc2</i> ::kanMX                                                                              | This study              |
| SN178  | h <sup>-</sup> $\Delta$ <i>vtc4</i> ::kanMX                                                                              | This study              |
| SN194  | h <sup>-</sup> <i>pho84</i> <sup>+</sup> -GFP::kanMX $\Delta$ <i>pqr1</i> ::hphMX                                        | This study              |
| SN198  | h <sup>-</sup> <i>pho842</i> <sup>+</sup> -GFP::kanMX $\Delta$ <i>pqr1</i> ::hphMX                                       | This study              |
| SN204  | h <sup>-</sup> $\Delta$ <i>vtc2</i> ::kanMX $\Delta$ <i>pqr1</i> ::hphMX                                                 | This study              |
| SN207  | h <sup>-</sup> $\Delta$ <i>vtc4</i> ::kanMX $\Delta$ <i>pqr1</i> ::hphMX                                                 | This study              |

|                        |                                                                                                             |             |
|------------------------|-------------------------------------------------------------------------------------------------------------|-------------|
| SN210                  | h <sup>+</sup> $\Delta pqr1::hphMX \Delta pho84::natMX \Delta pho842::kanMX$                                | This study  |
| SN230                  | h <sup>-</sup> $\Delta pho84::natMX \Delta pho842::kanMX$                                                   | This study  |
| SN259                  | h <sup>-</sup> $\Delta vtc2::kanMX \Delta pqr1::hphMX GFP-atg8^+:leu1^+ leu1-32$                            | This study  |
| SN263                  | h <sup>-</sup> $\Delta vtc2::kanMX GFP-atg8^+:leu1^+ leu1-32$                                               | This study  |
| SN266                  | h <sup>-</sup> $\Delta vtc4::kanMX \Delta pqr1::hphMX GFP-atg8^+:leu1^+ leu1-32$                            | This study  |
| SN270                  | h <sup>-</sup> $\Delta vtc2::kanMX GFP-atg8^+:leu1^+ leu1-32$                                               | This study  |
| SN274                  | h <sup>-</sup> $\Delta pqr1::hphMX \Delta pho84::natMX \Delta pho842::kanMX$<br>$GFP-atg8^+:leu1^+ leu1-32$ | This study  |
| SN286                  | h <sup>-</sup> $\Delta pho84::natMX \Delta pho842::kanMX GFP-atg8^+:leu1^+ leu1-32$                         | This study  |
| TK375                  | h <sup>+</sup> $GFP-atg8^+:leu1^+ leu1-32$                                                                  | This study  |
| TK427                  | h <sup>-</sup> $\Delta pqr1::kanMX GFP-atg8^+:leu1^+ leu1-32$                                               | This study  |
| TKN33                  | h <sup>-</sup> $atg13^+-V5:natMX psk1^+-FLAG5:kanMX$                                                        | This study* |
| TKN40                  | h <sup>-</sup> $\Delta pqr1::hphMX atg13^+-V5:natMX psk1^+-FLAG5:kanMX$                                     | This study* |
| WT(972h <sup>-</sup> ) | h <sup>-</sup>                                                                                              | NBRP yeast  |

\*:  $psk1^+-FLAG5:kanMX$  was derived from NBRP yeast Japan as FY31941 (h<sup>-</sup>  $leu1-32 psk1^+-FLAG5:kanMX$ ). #: These gene-deletion mutants were originally derived from haploid gene deletion library (BIONEER). They were back-crossed with WT to remove auxotrophic mutations.  
\$: including gene-deletion derived from BIONEER haploid gene deletion library
